# Supplementary material for: Resolution of the Hypoxylon fuscum Complex (Hypoxylaceae, Xylariales) and Discovery and Biological Characterization of Two of Its Prominent Secondary Metabolites
Source: MDPI journal article supplement (doi:10.3390/jof7020131), 2021-02-11
Supplement: s1 [file s1]

# Resolution of the *Hypoxylon fuscum* complex (Hypoxylaceae, Xylariales) and discovery and biological characterization of two of its prominent secondary metabolites

Christopher Lambert<sup>1,2,†</sup>, Mohammad Javad Pourmoghaddam<sup>1, 3,4,†</sup>, Marjorie Cedeño–Sanchez<sup>1,2</sup>, Frank Surup<sup>1,2</sup>, Seyed Akbar Khodaparast<sup>3</sup>, Irmgard Krisai-Greilhuber<sup>4</sup>, Hermann Voglmayr<sup>4,5</sup>, Theresia E.B. Stradal<sup>6,7,\*</sup> and Marc Stadler<sup>1,2,7,\*</sup>

1 Department for Microbial Drugs, Helmholtz-Centre for Infection Research GmbH, and Institute of Microbiology, Inhoffenstraße 7, 38124 Braunschweig, Germany

2 German Centre for Infection Research (DZIF), Partner Site Hannover-Braunschweig, 38124 Braunschweig, Germany

3 Department of Plant Protection, Faculty of Agricultural Sciences, University of Guilan, Rasht, Iran

4 Department of Botany and Biodiversity Research, University of Vienna, Rennweg 14, 1030, Wien, Austria

5 Institute of Forest Entomology, Forest Pathology and Forest Protection, Department of Forest and Soil Sciences, BOKU-University of Natural Resources and Life Sciences, Franz Schwackhöfer Haus, Peter-Jordan-Straße 82/I, 1190 Vienna, Austria

6 Department for Cell Biology, Helmholtz-Centre for Infection Research GmbH, Inhoffenstraße 7, 38124 Braunschweig, Germany

7 Institute of Microbiology, Technische Universität Braunschweig, Spielmannstraße 7, 38106 Braunschweig

\* \* Correspondence: marc.stadler@helmholtz-hzi.de; Tel.: +49-531-6181-4240; Fax: +49-531-6181-9499

## Supplementary Information

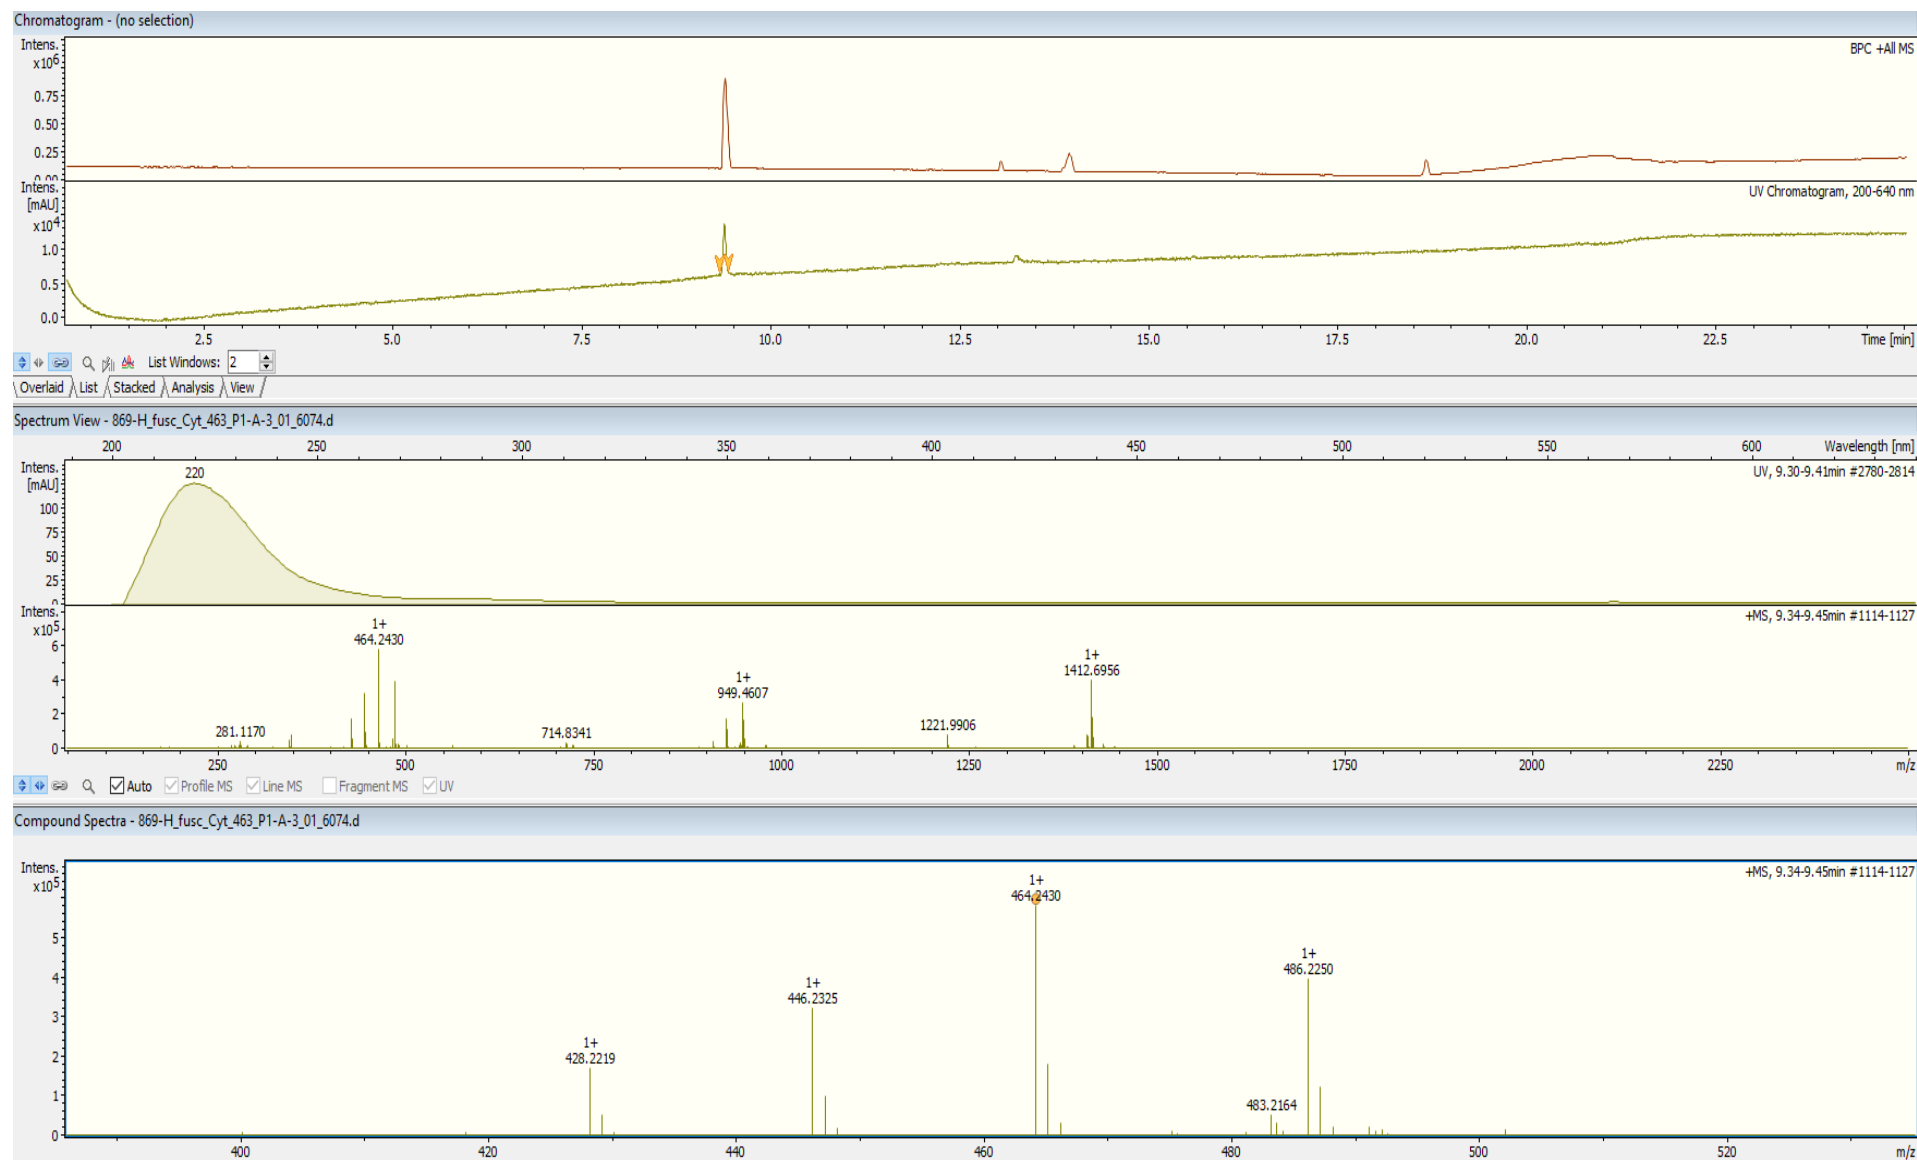

Fig. S1. HRESIMS data of pseudofuscochalasin A (**4**).

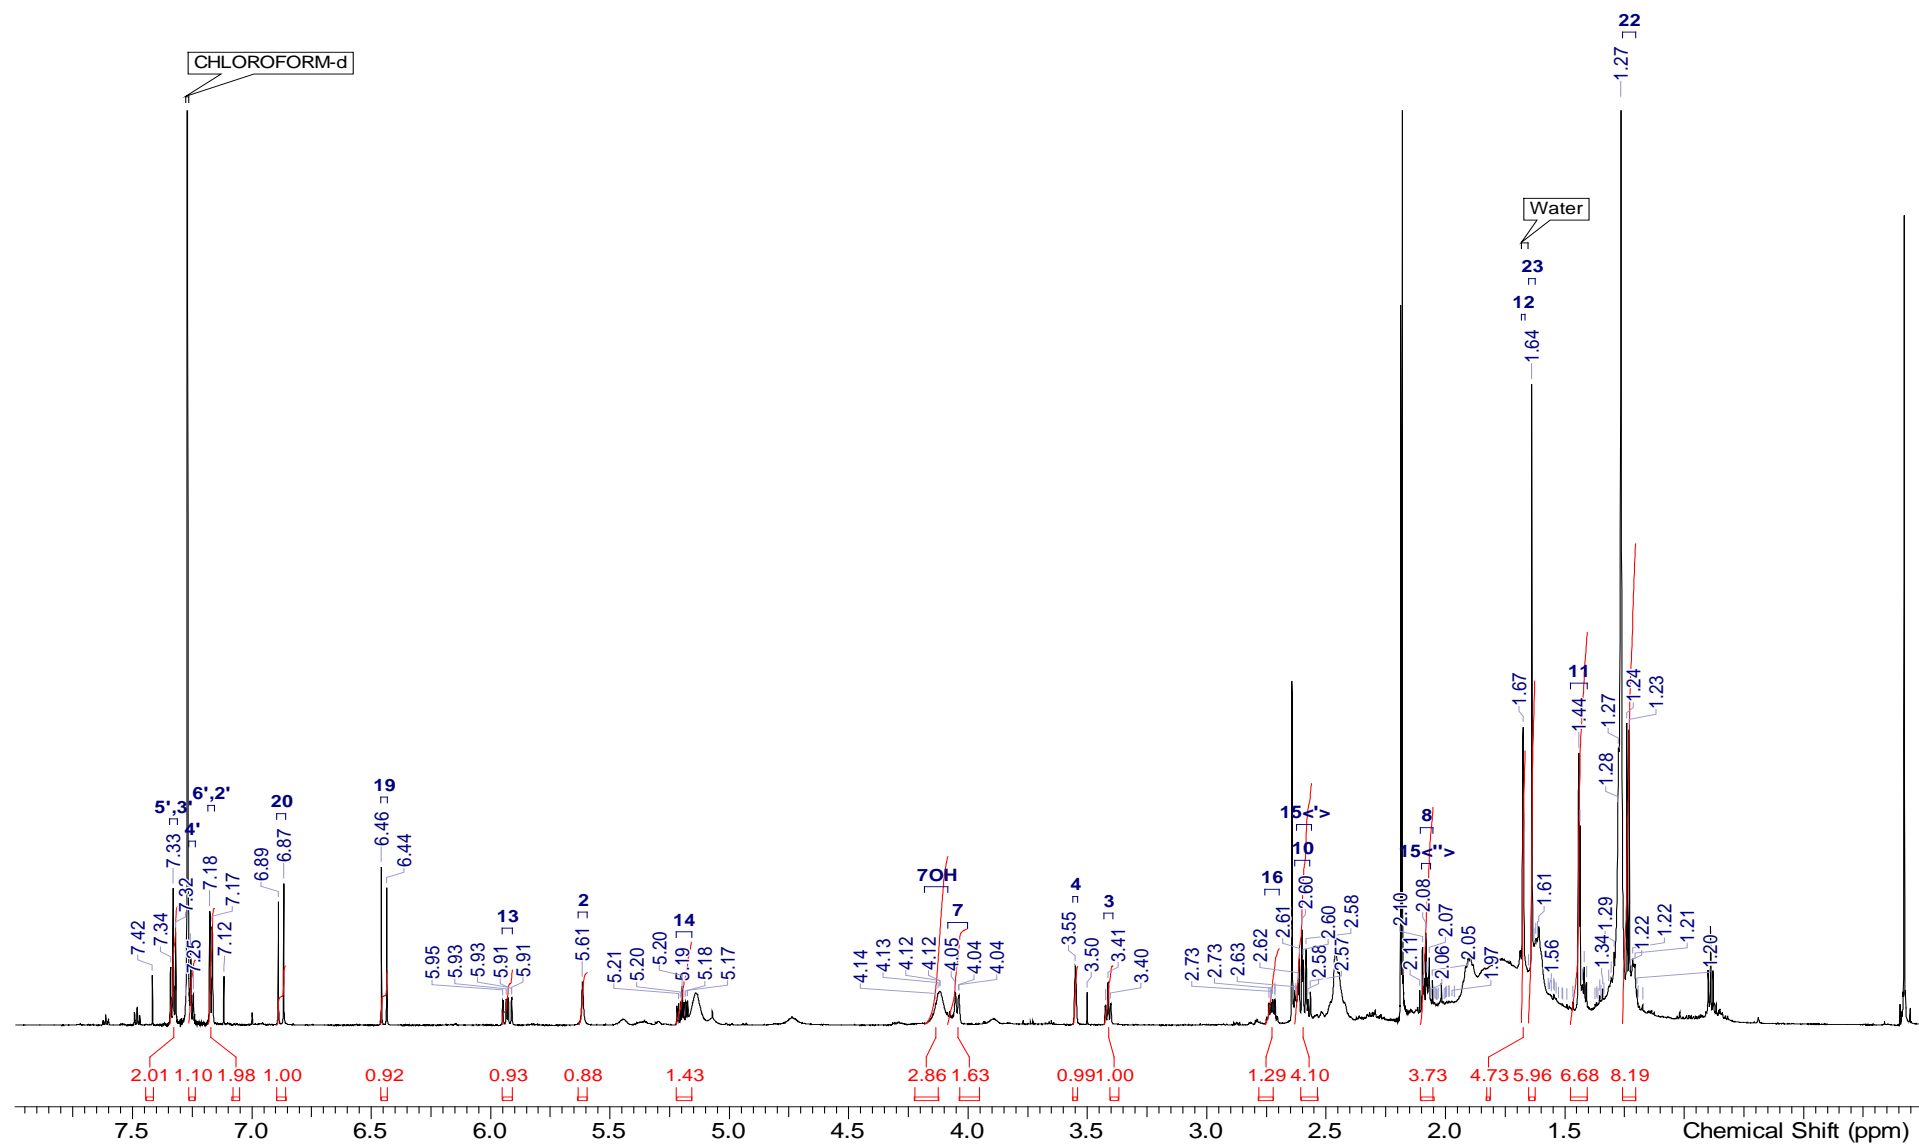

Fig S2. <sup>1</sup>H NMR spectrum (500 MHz, chloroform-*d*) of pseudofuscochalsin A (**4**).

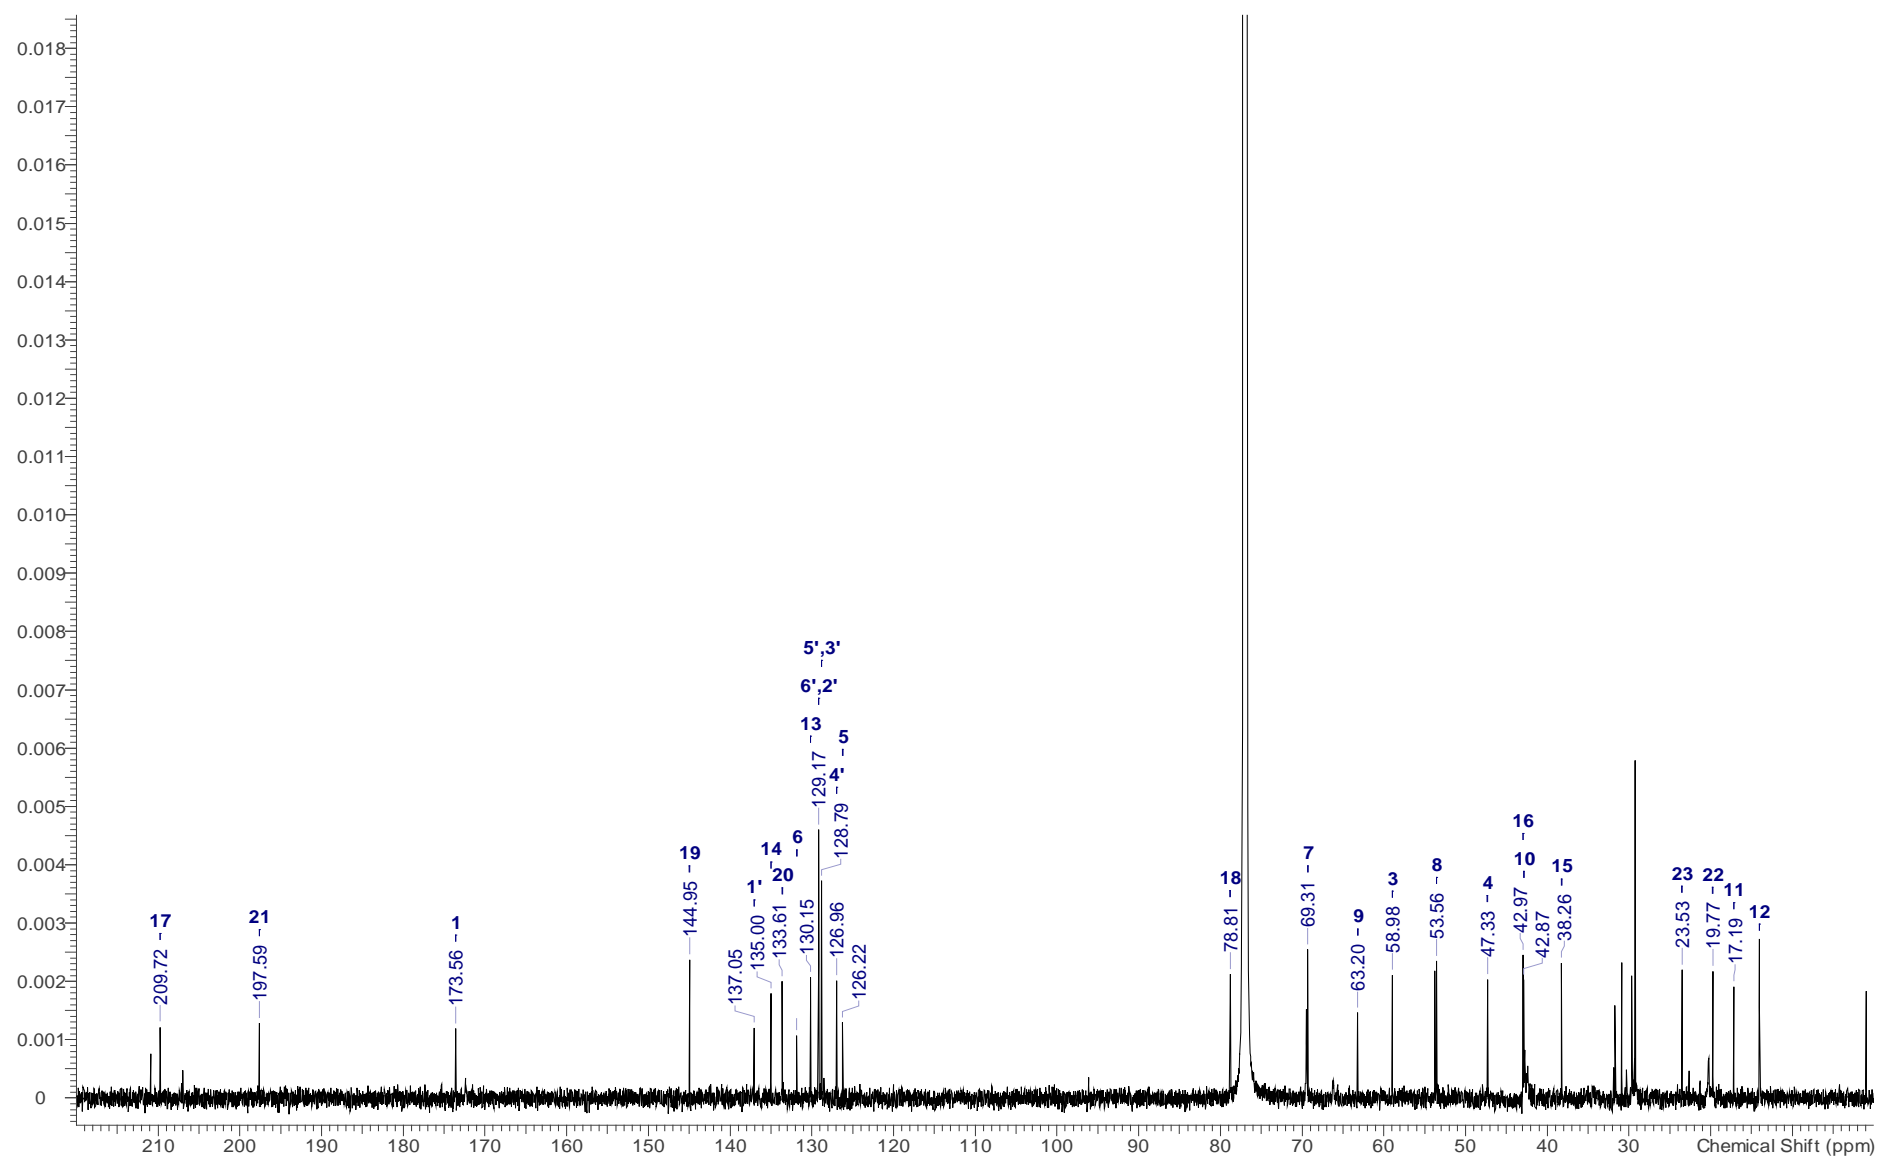

Fig. S3 <sup>13</sup>C NMR spectrum (125 MHz, chloroform-*d*) of pseudofuscochalcasin A (**4**).

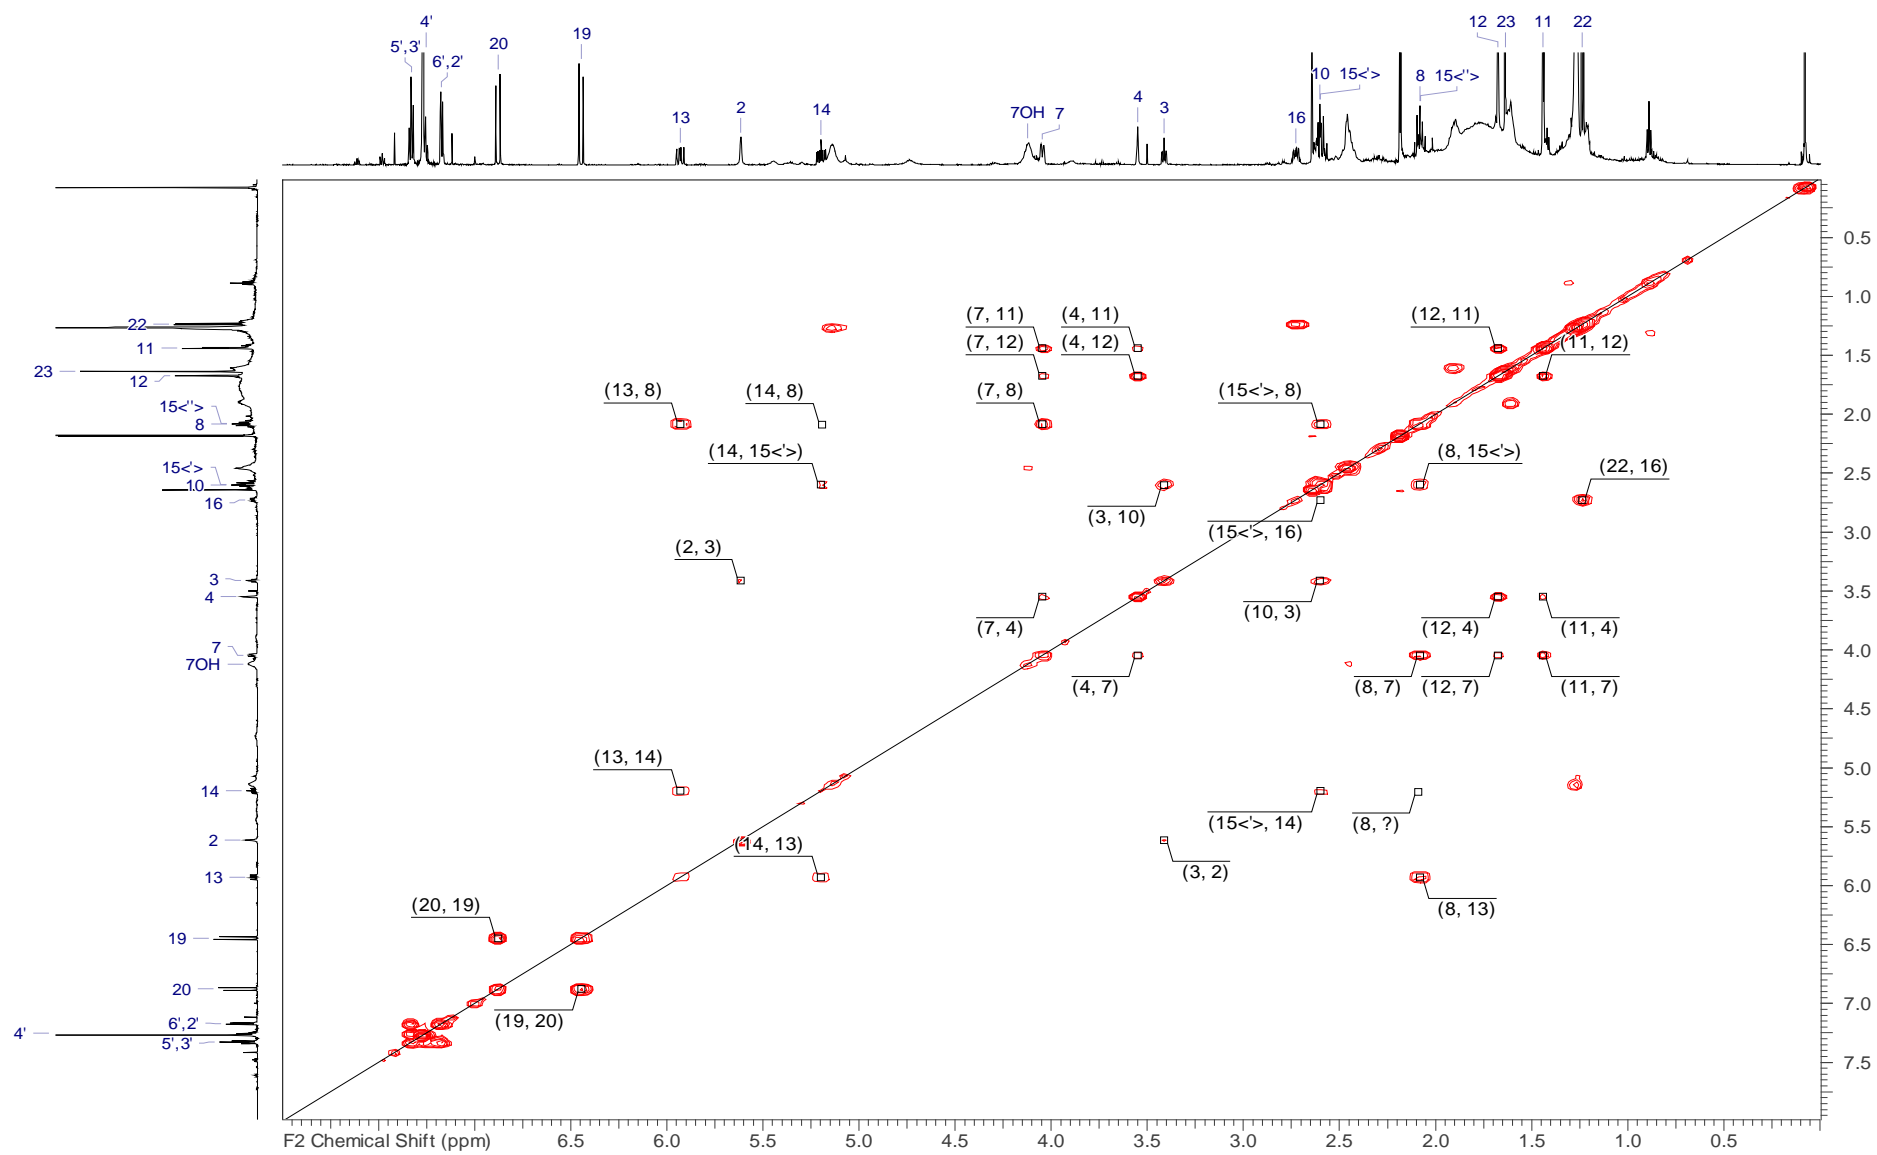

Fig. S4. COSY NMR spectrum (500 MHz, chloroform-*d*) of pseudofuscochalcasin A (**4**).



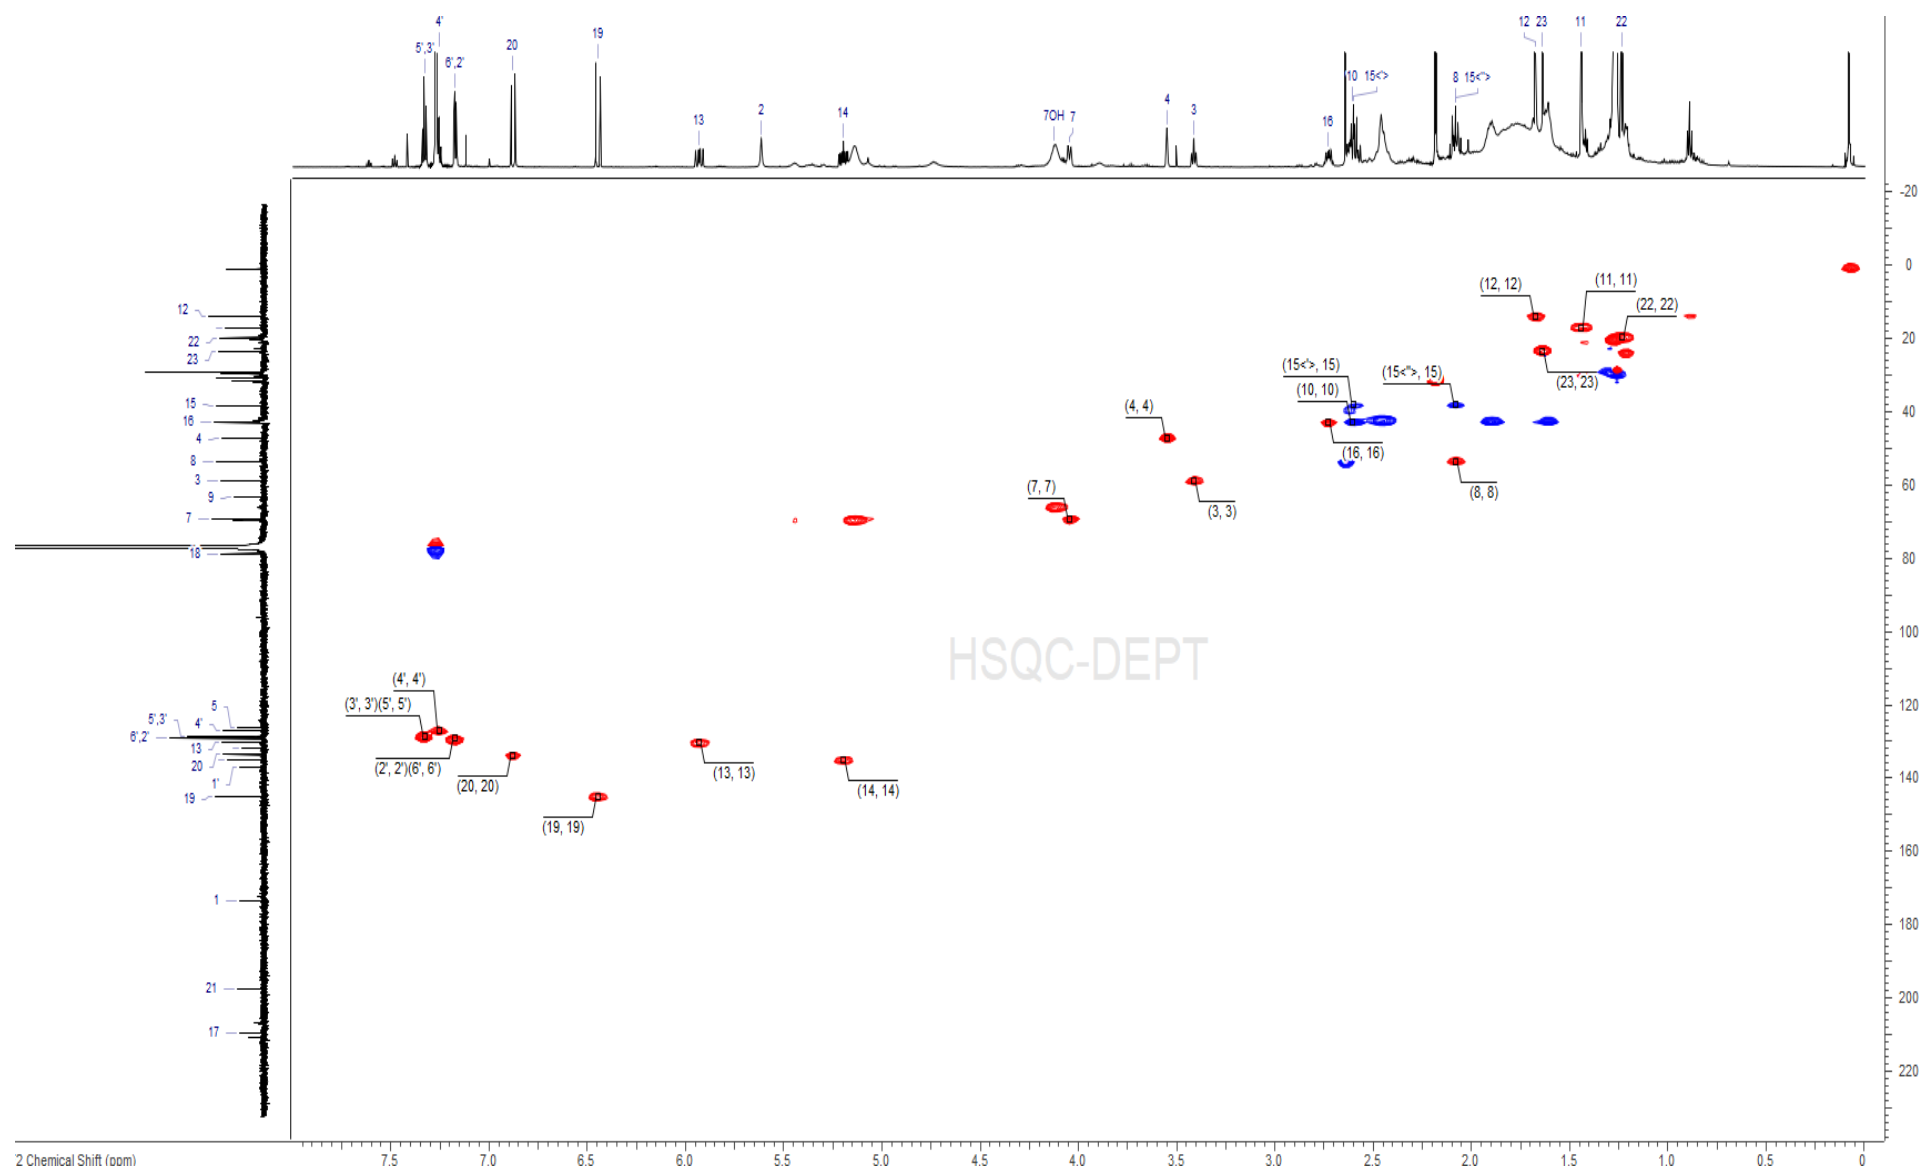

Fig. S6. HSQC NMR spectrum (500 MHz, chloroform- $d$ ) of pseudofuscochalcasin A (**4**).

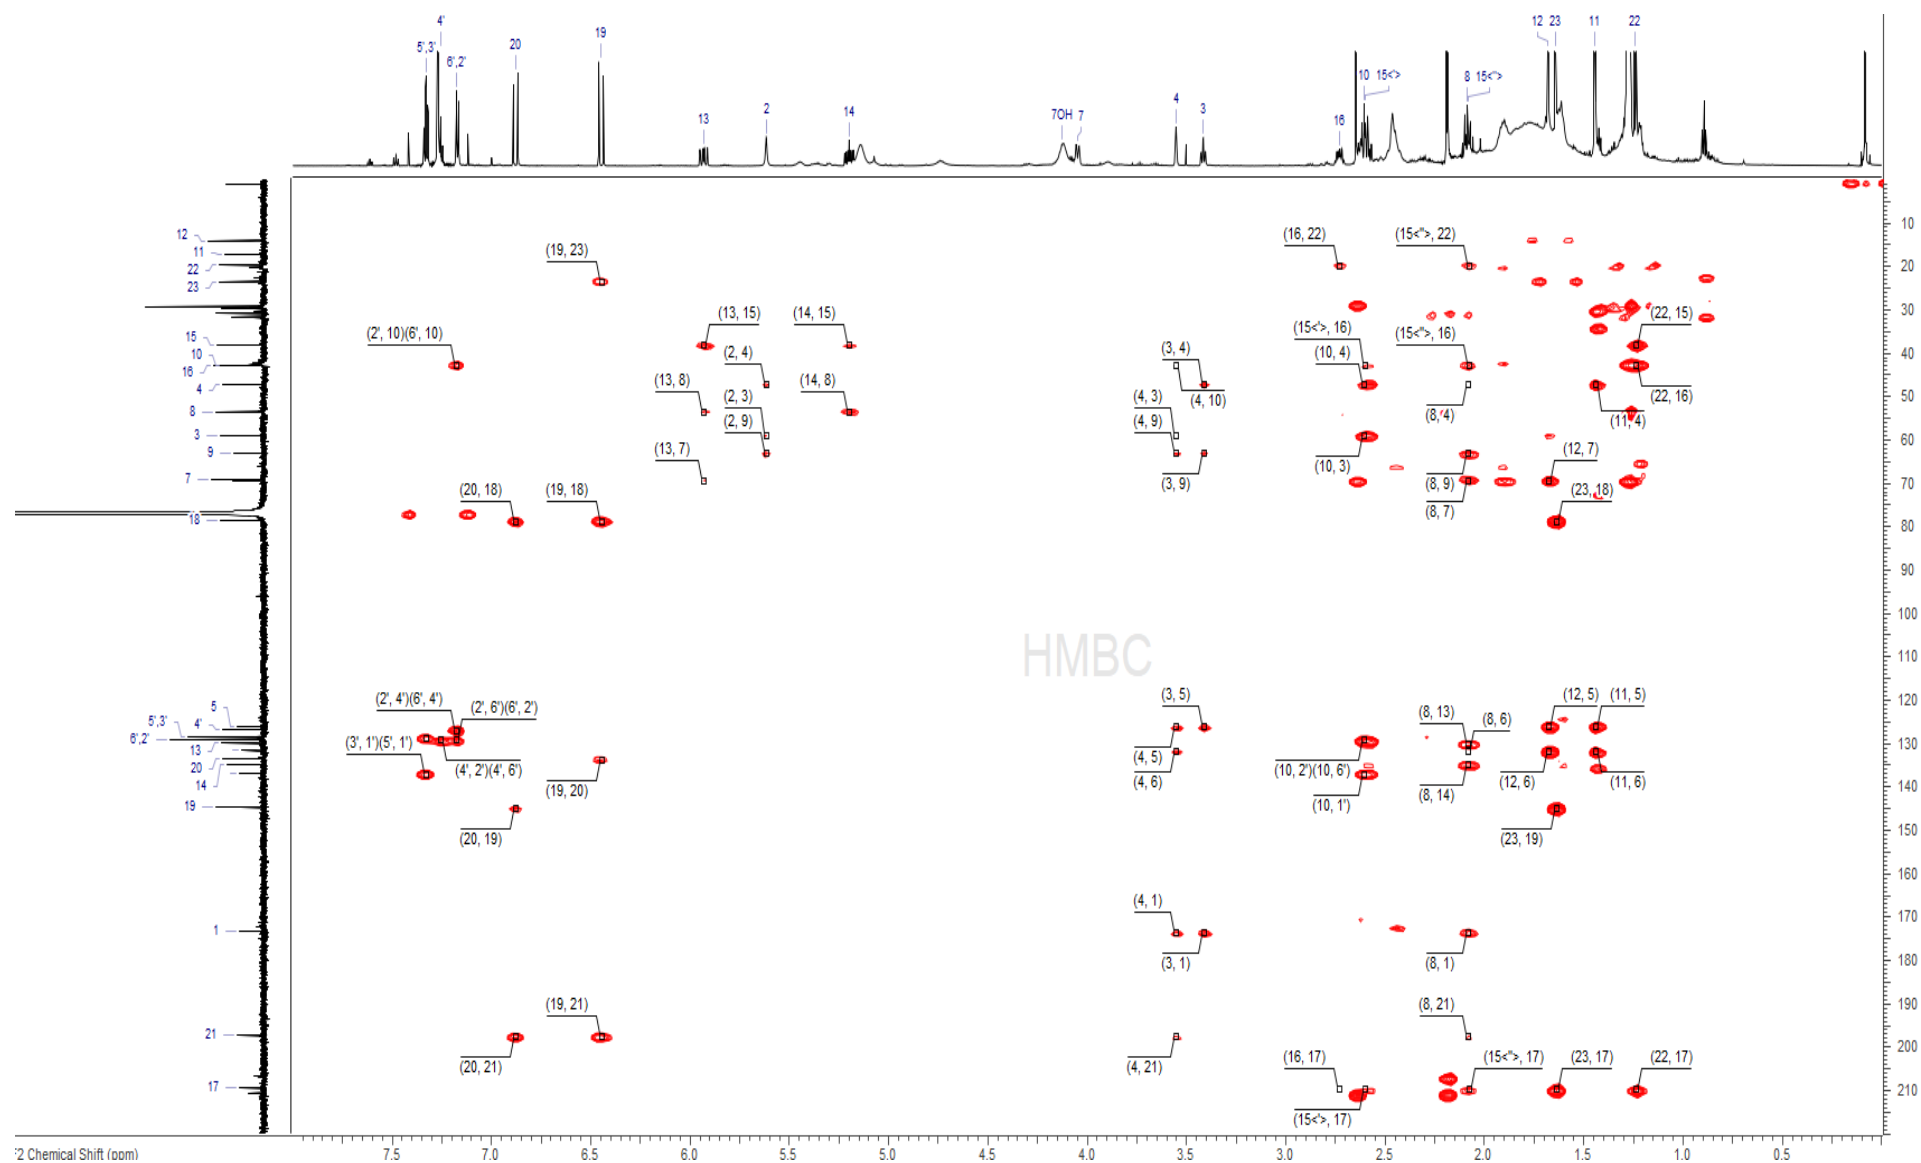

Fig. S7. HMBC NMR spectrum (500 MHz, chloroform- $d$ ) of pseudofuscochalin A (**4**).



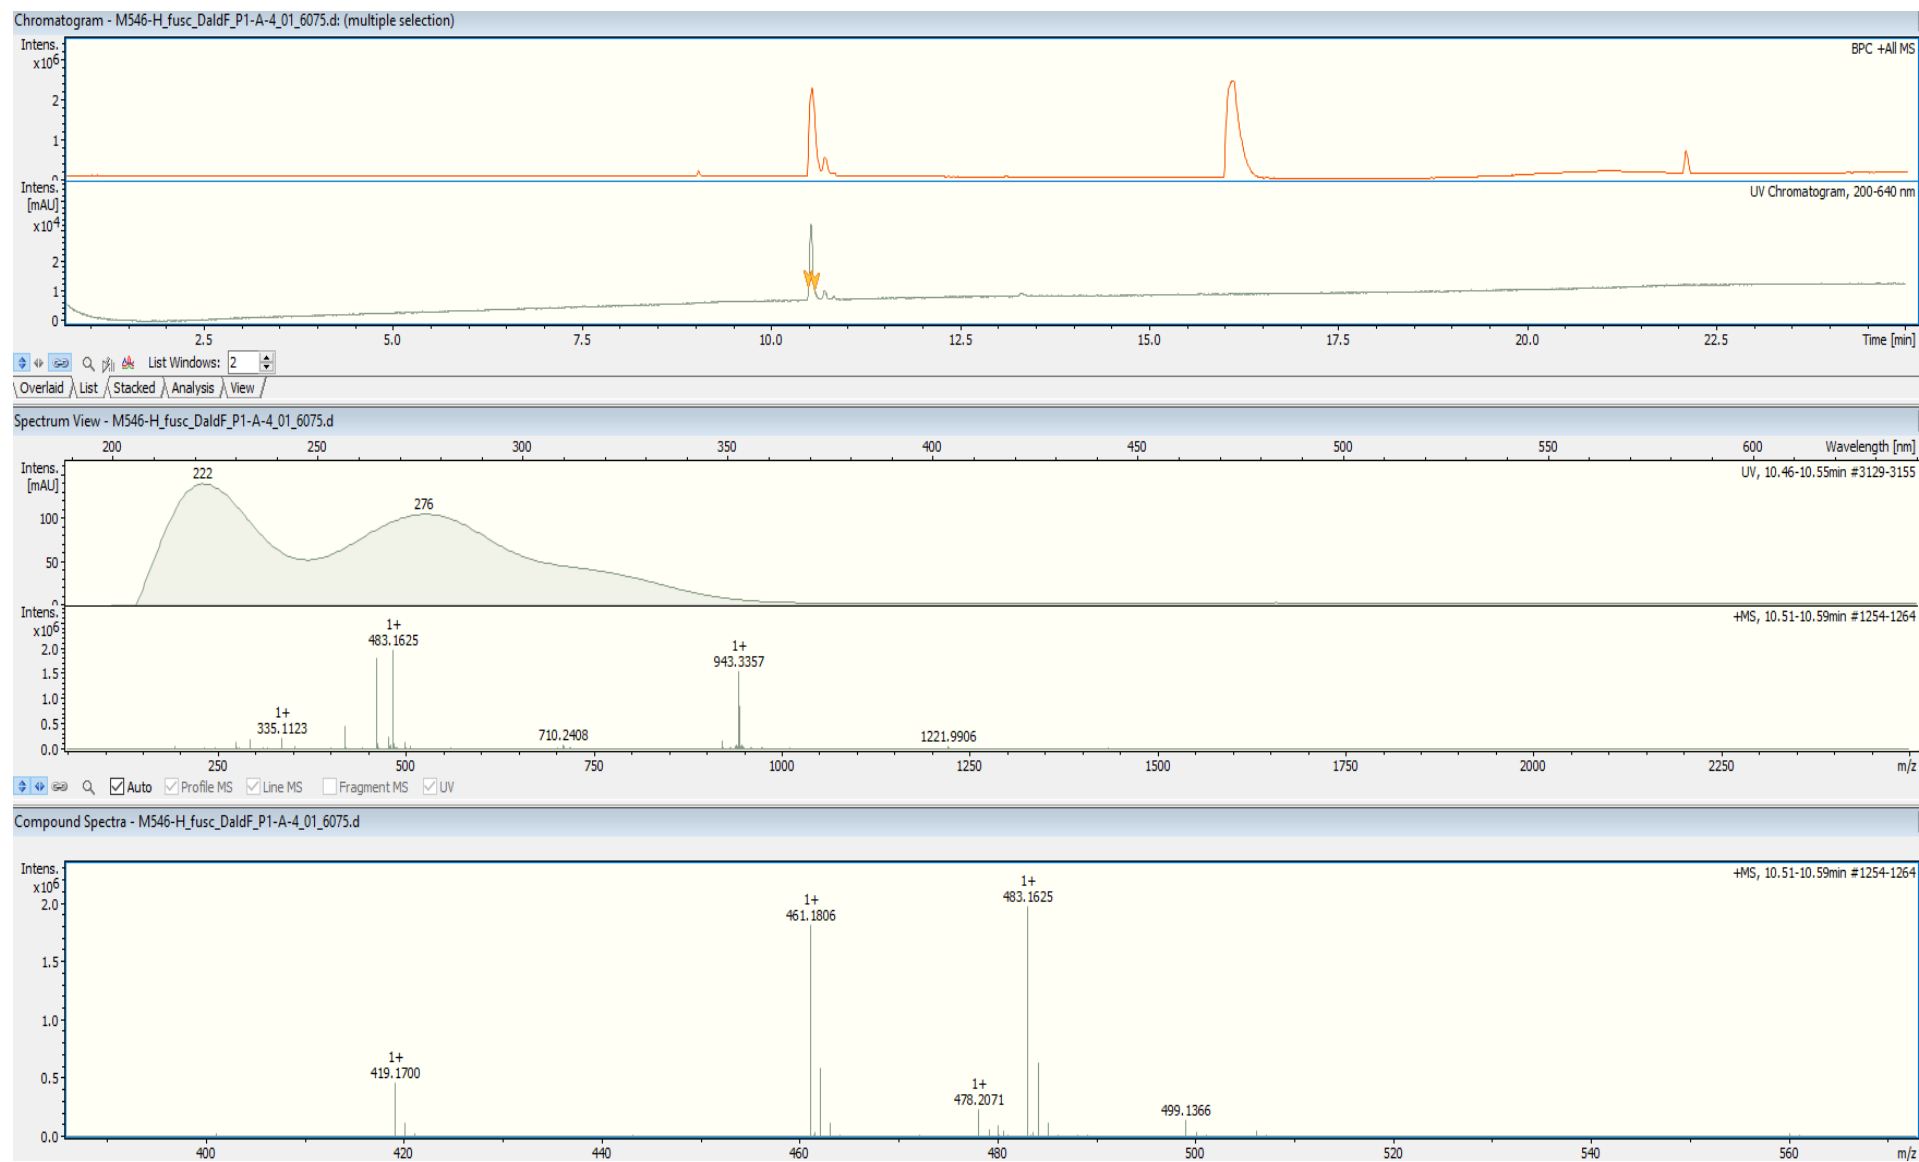

Fig. S8. HRESIMS data of daldinin F (5).

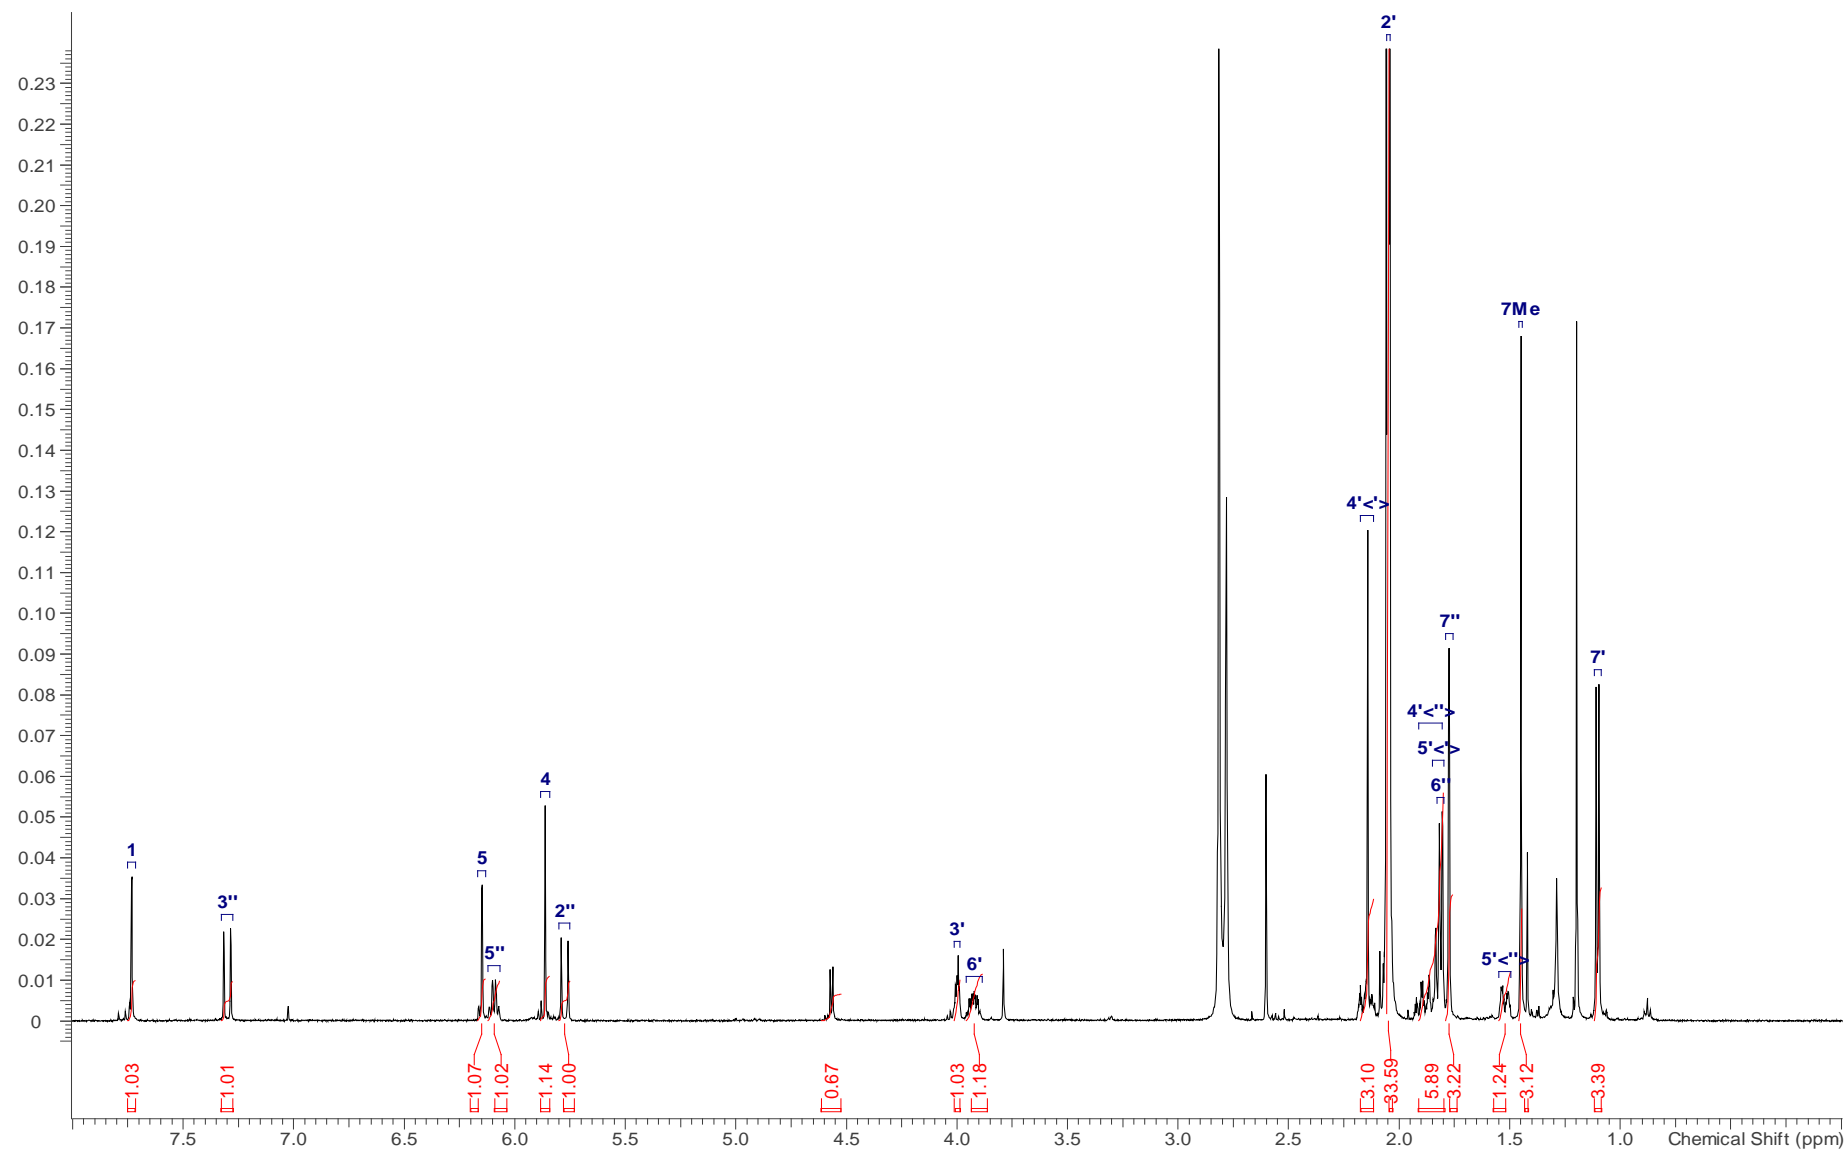

Fig. S9.  $^1\text{H}$  NMR spectrum (500 MHz,  $\text{chloroform-}d$ ) of daldinin F (5).

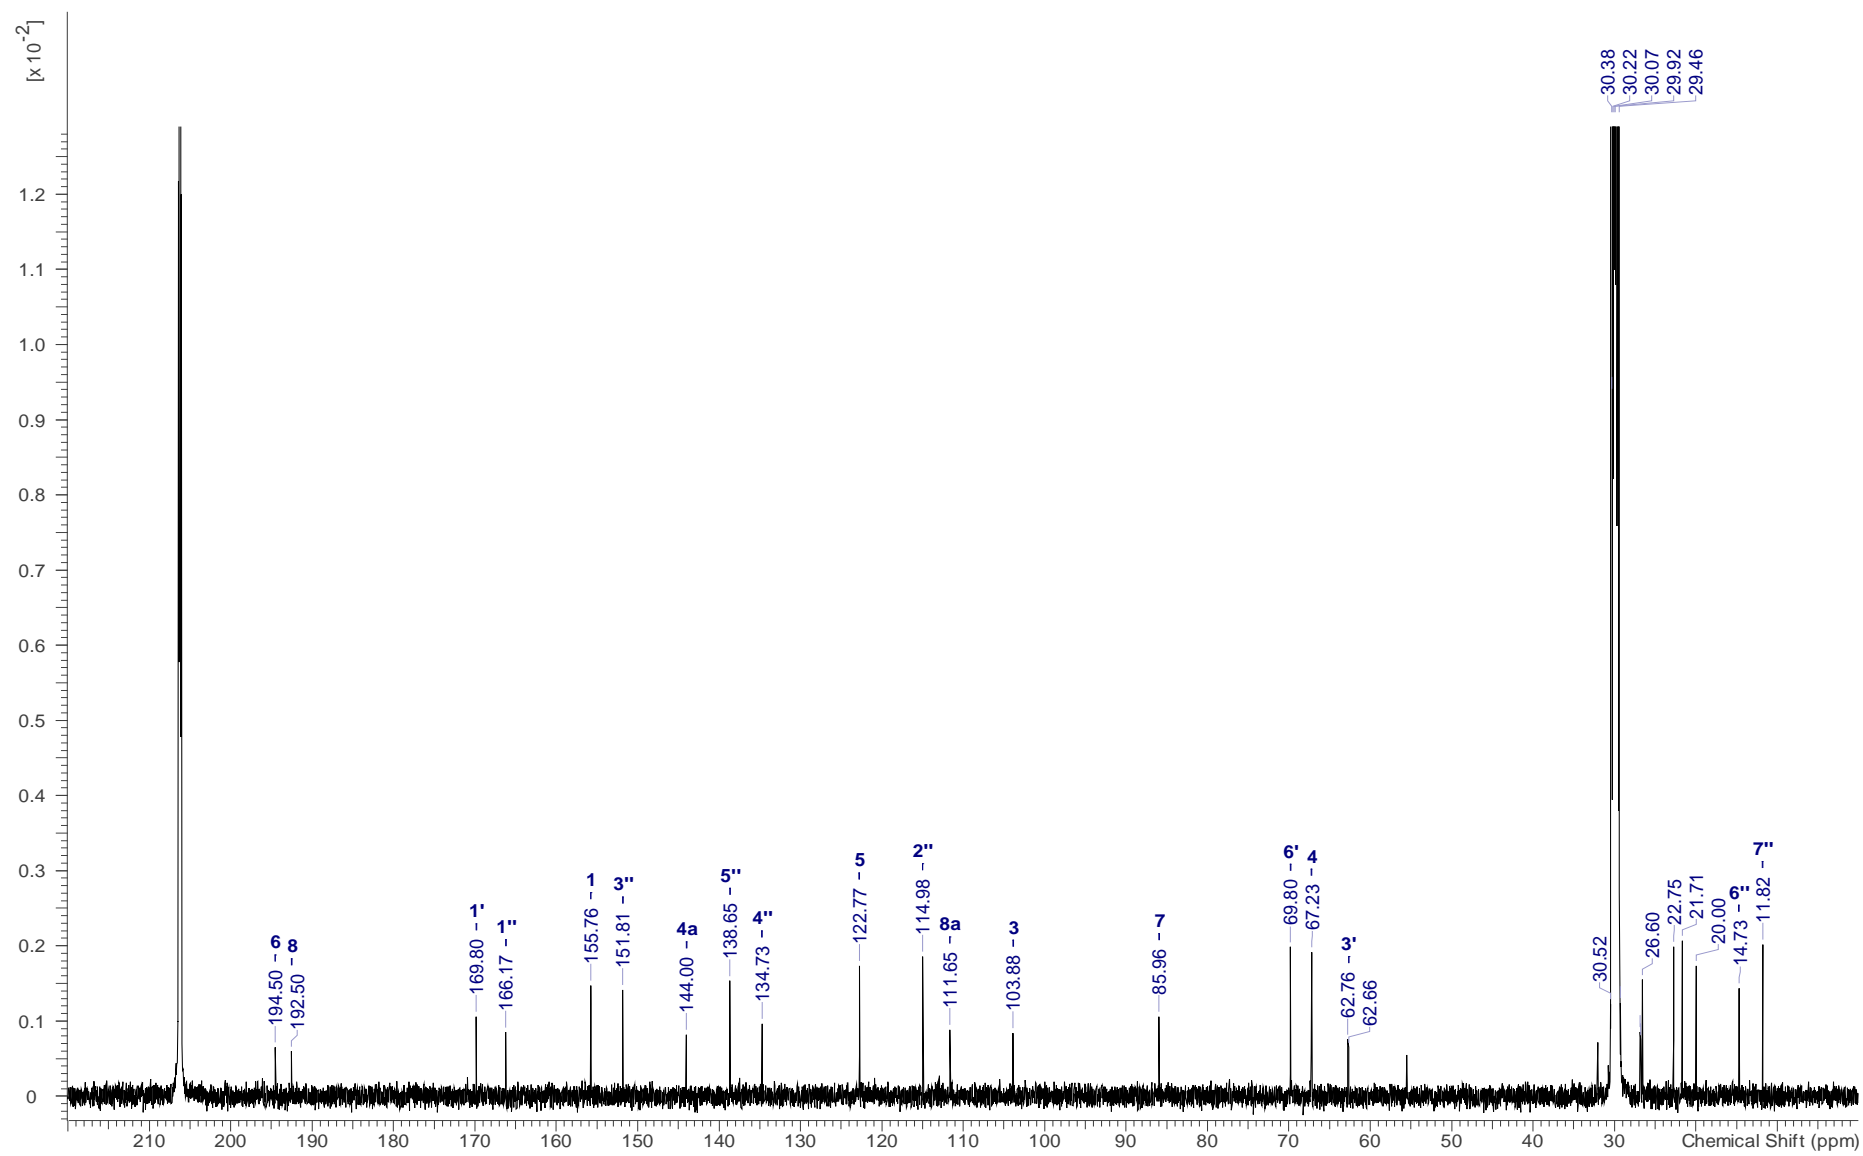

Fig. S10  $^{13}\text{C}$  NMR spectrum (125 MHz, chloroform-*d*) of daldinin F (5).

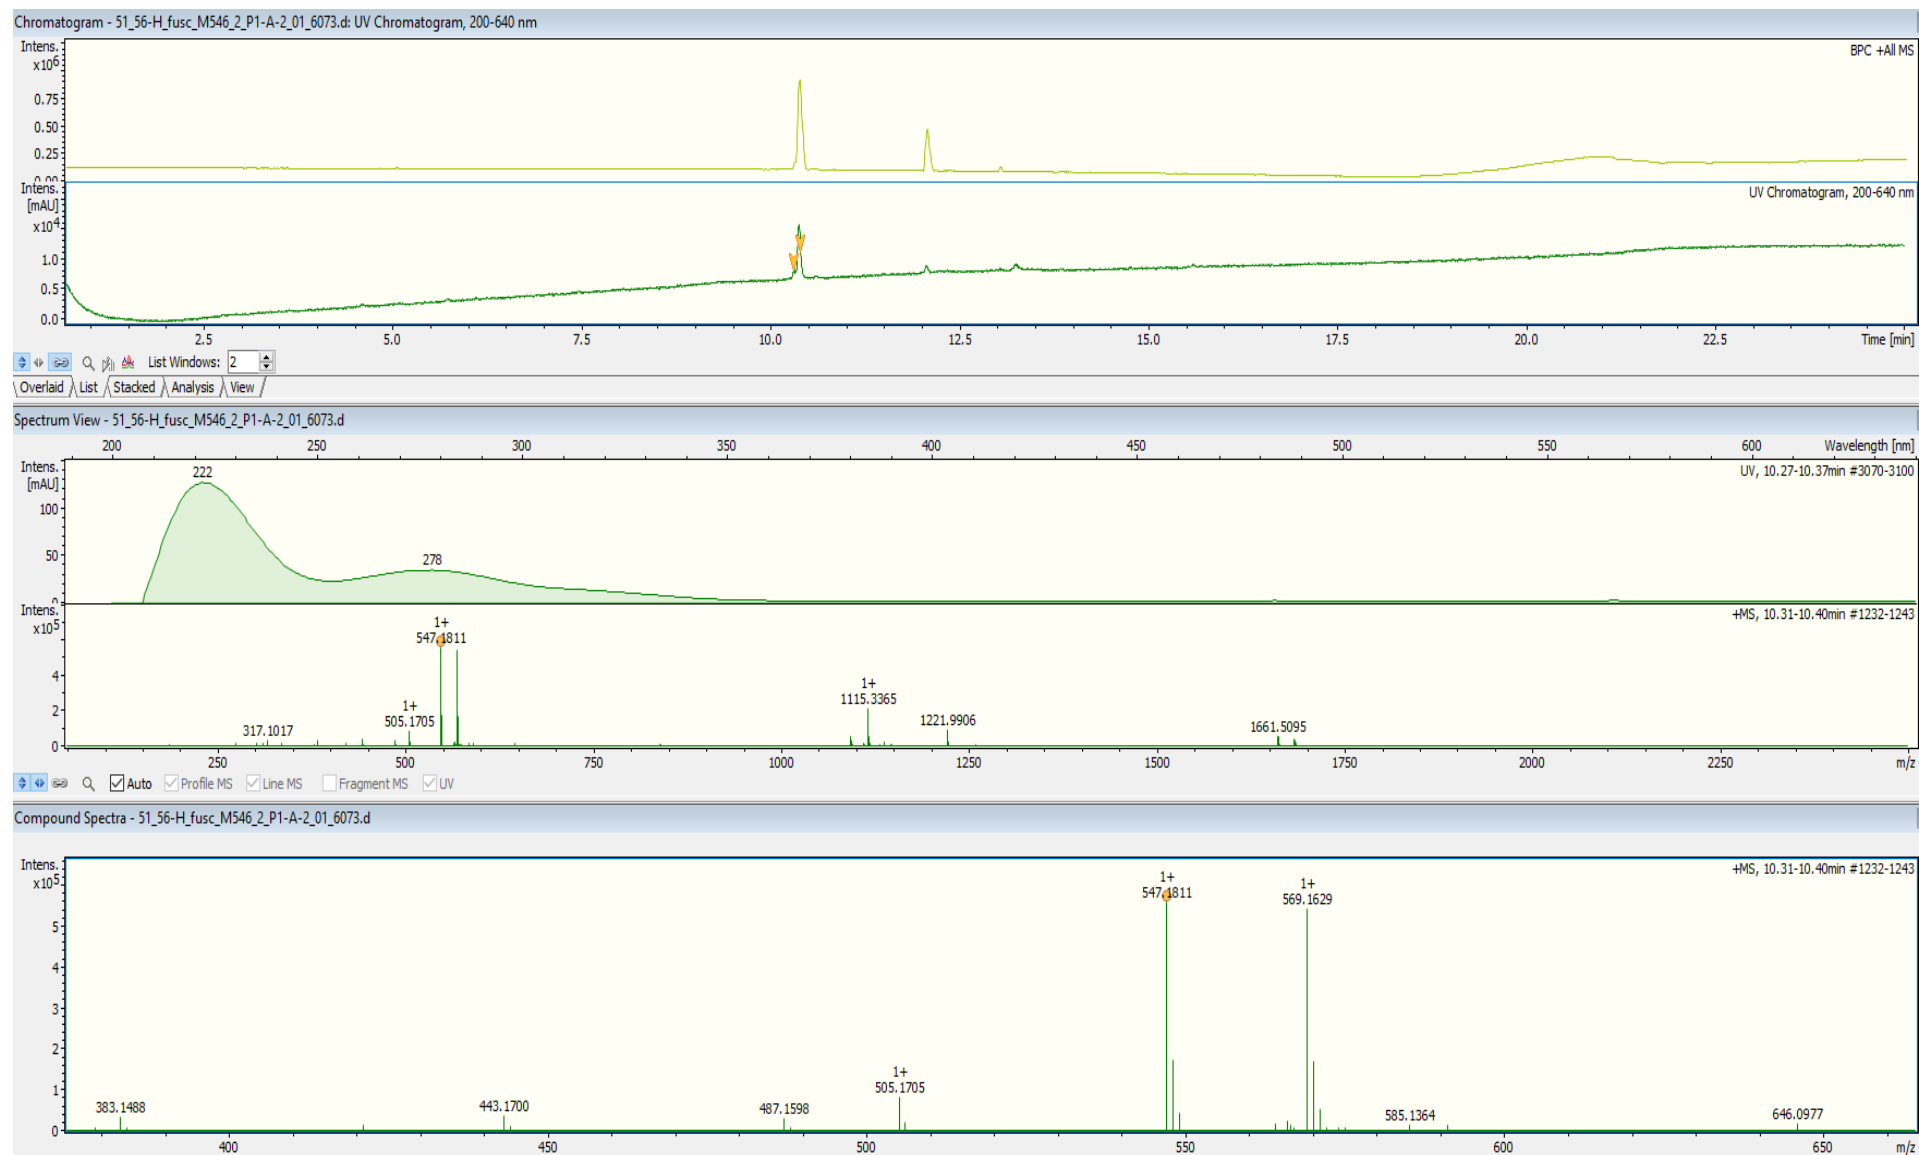

Fig. S11. HRESIMS data of 3'-malonyl-daldinin F (**6**).

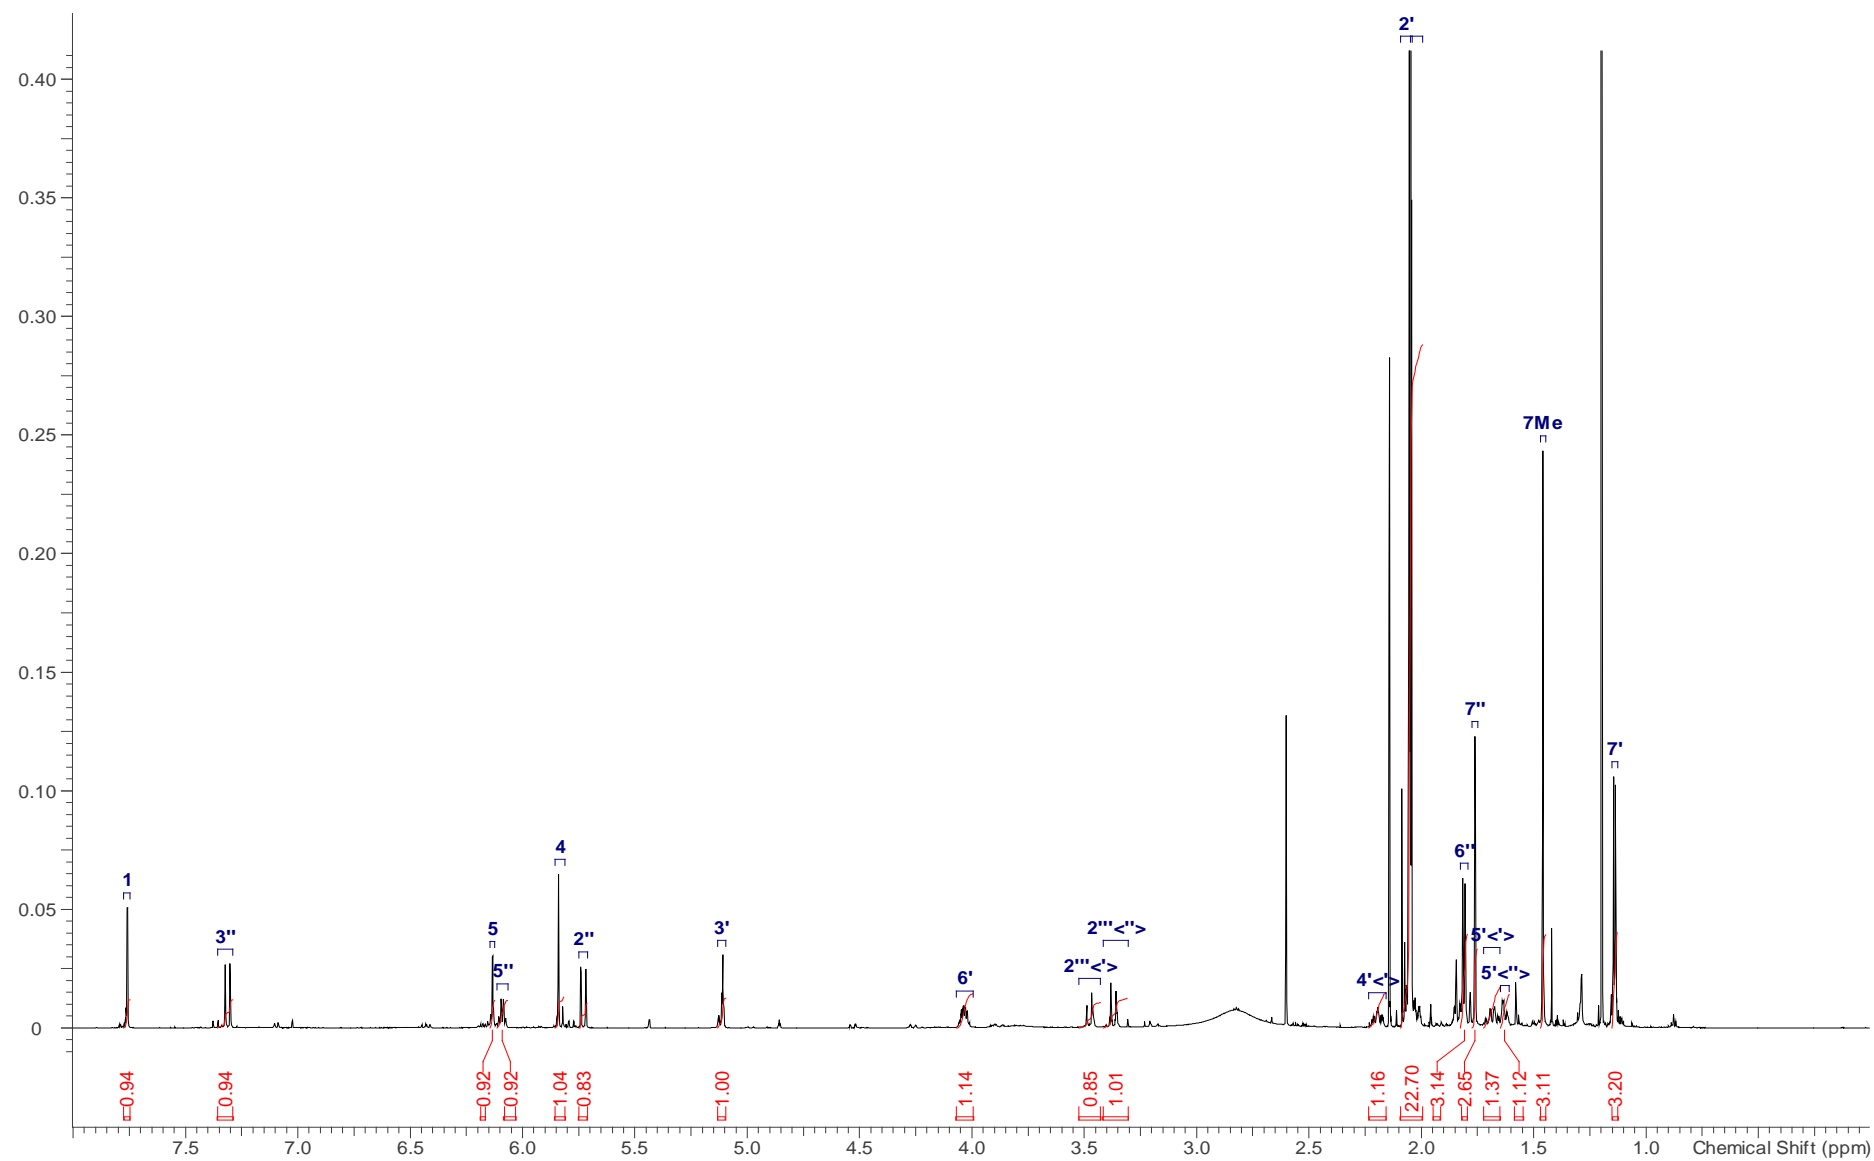

Fig. S12  $^1\text{H}$  NMR spectrum (700 MHz,  $\text{acetone-}d_6$ ) of 3-malonyl daldinin F (6).

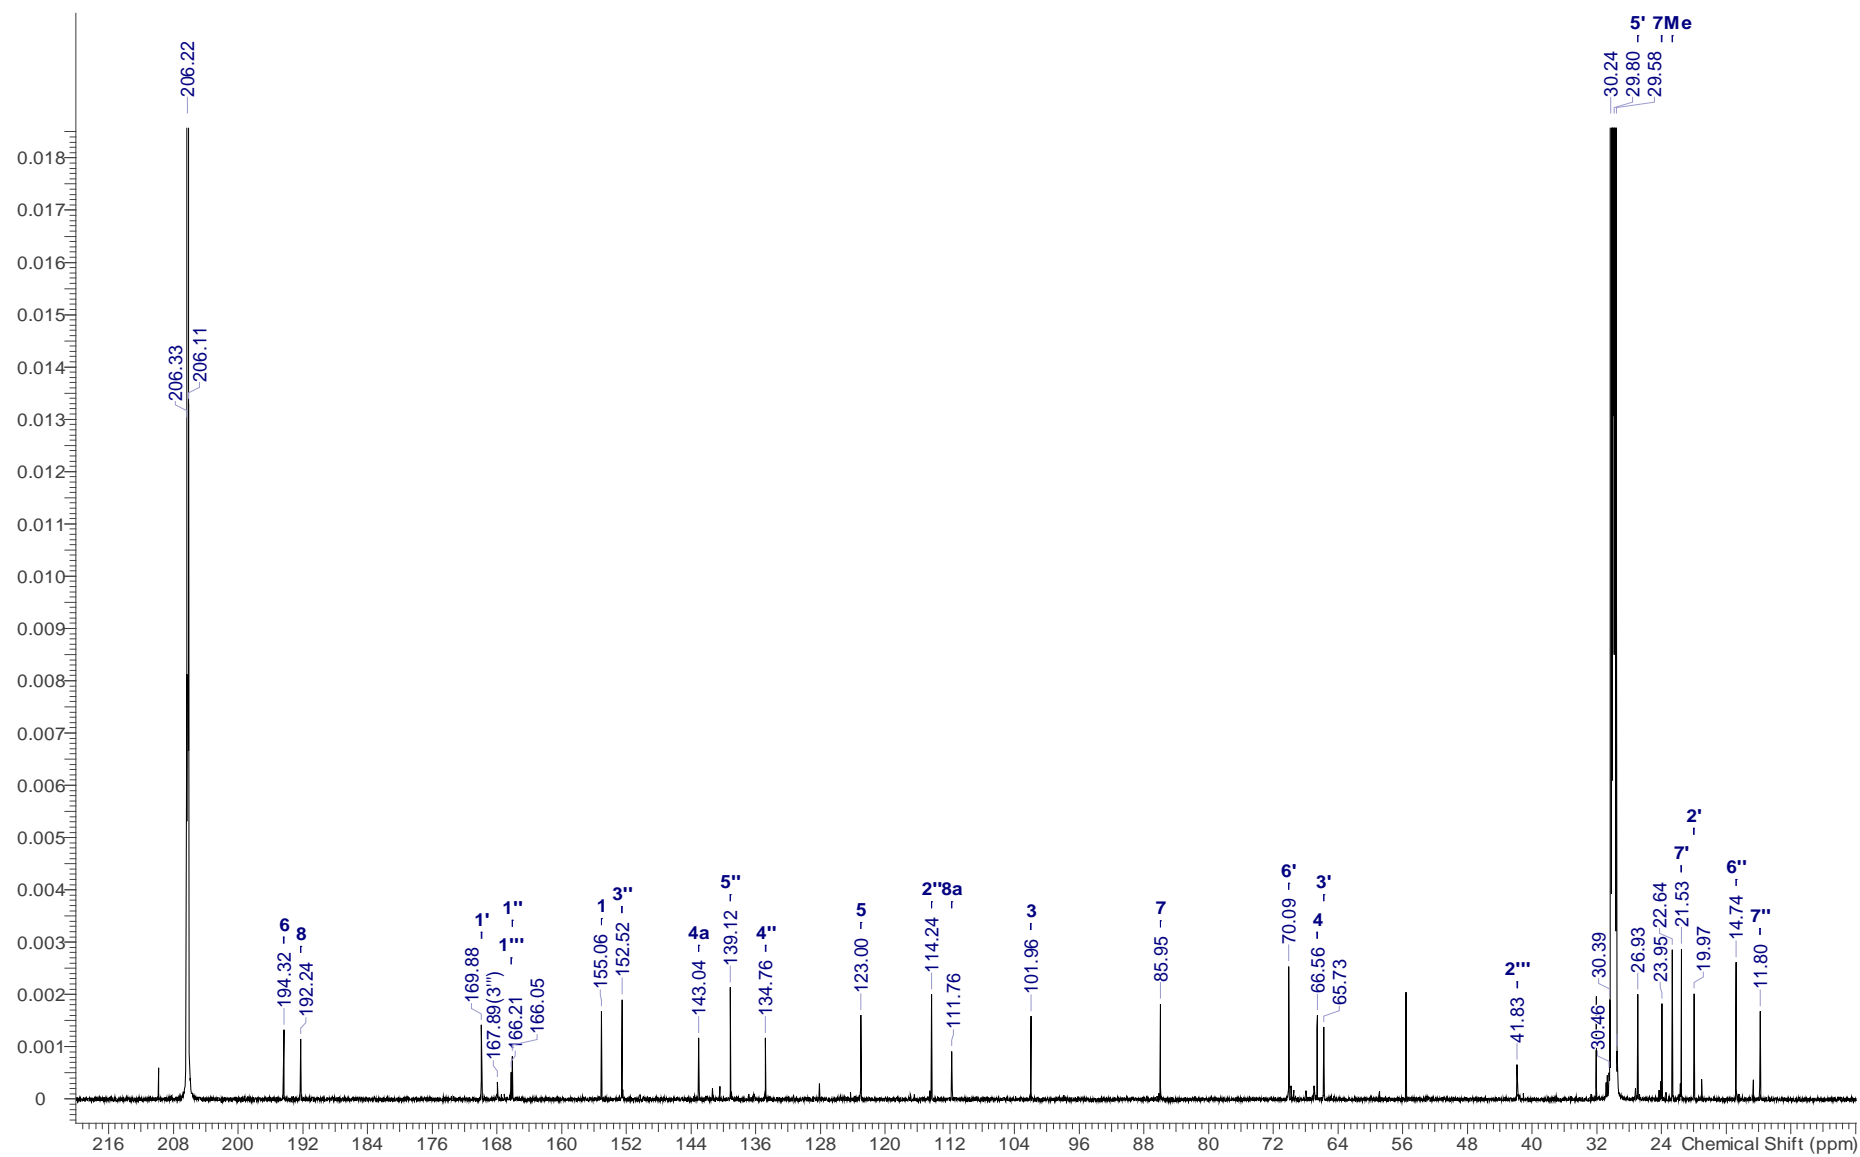

Fig. S13. <sup>13</sup>C NMR spectrum (175 MHz, aceton-*d*<sub>6</sub>) of 3-malonyl daldinin F (6).

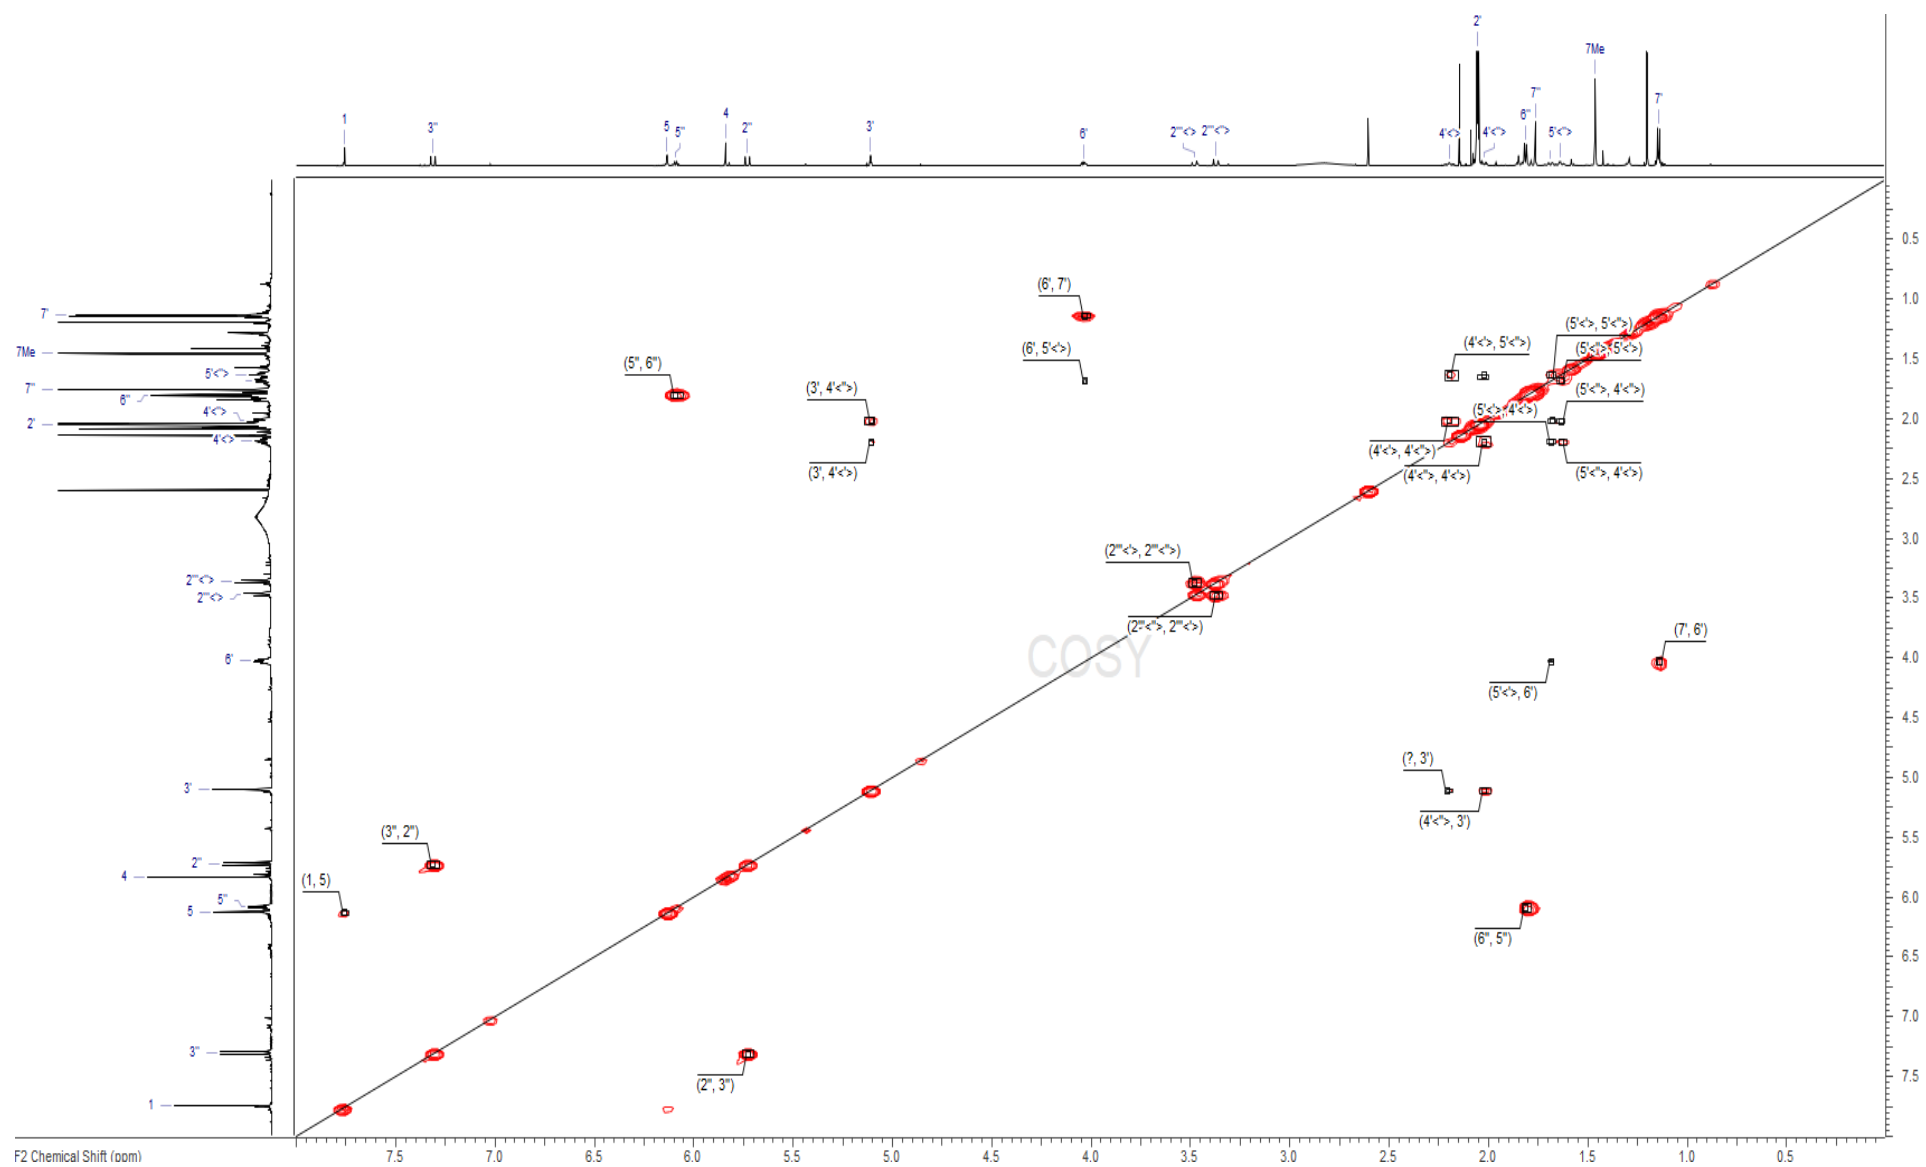

Fig. S14. COSY NMR spectrum (700 MHz, acetone- $d_6$ ) 3-malonyl daldinin F (**6**).

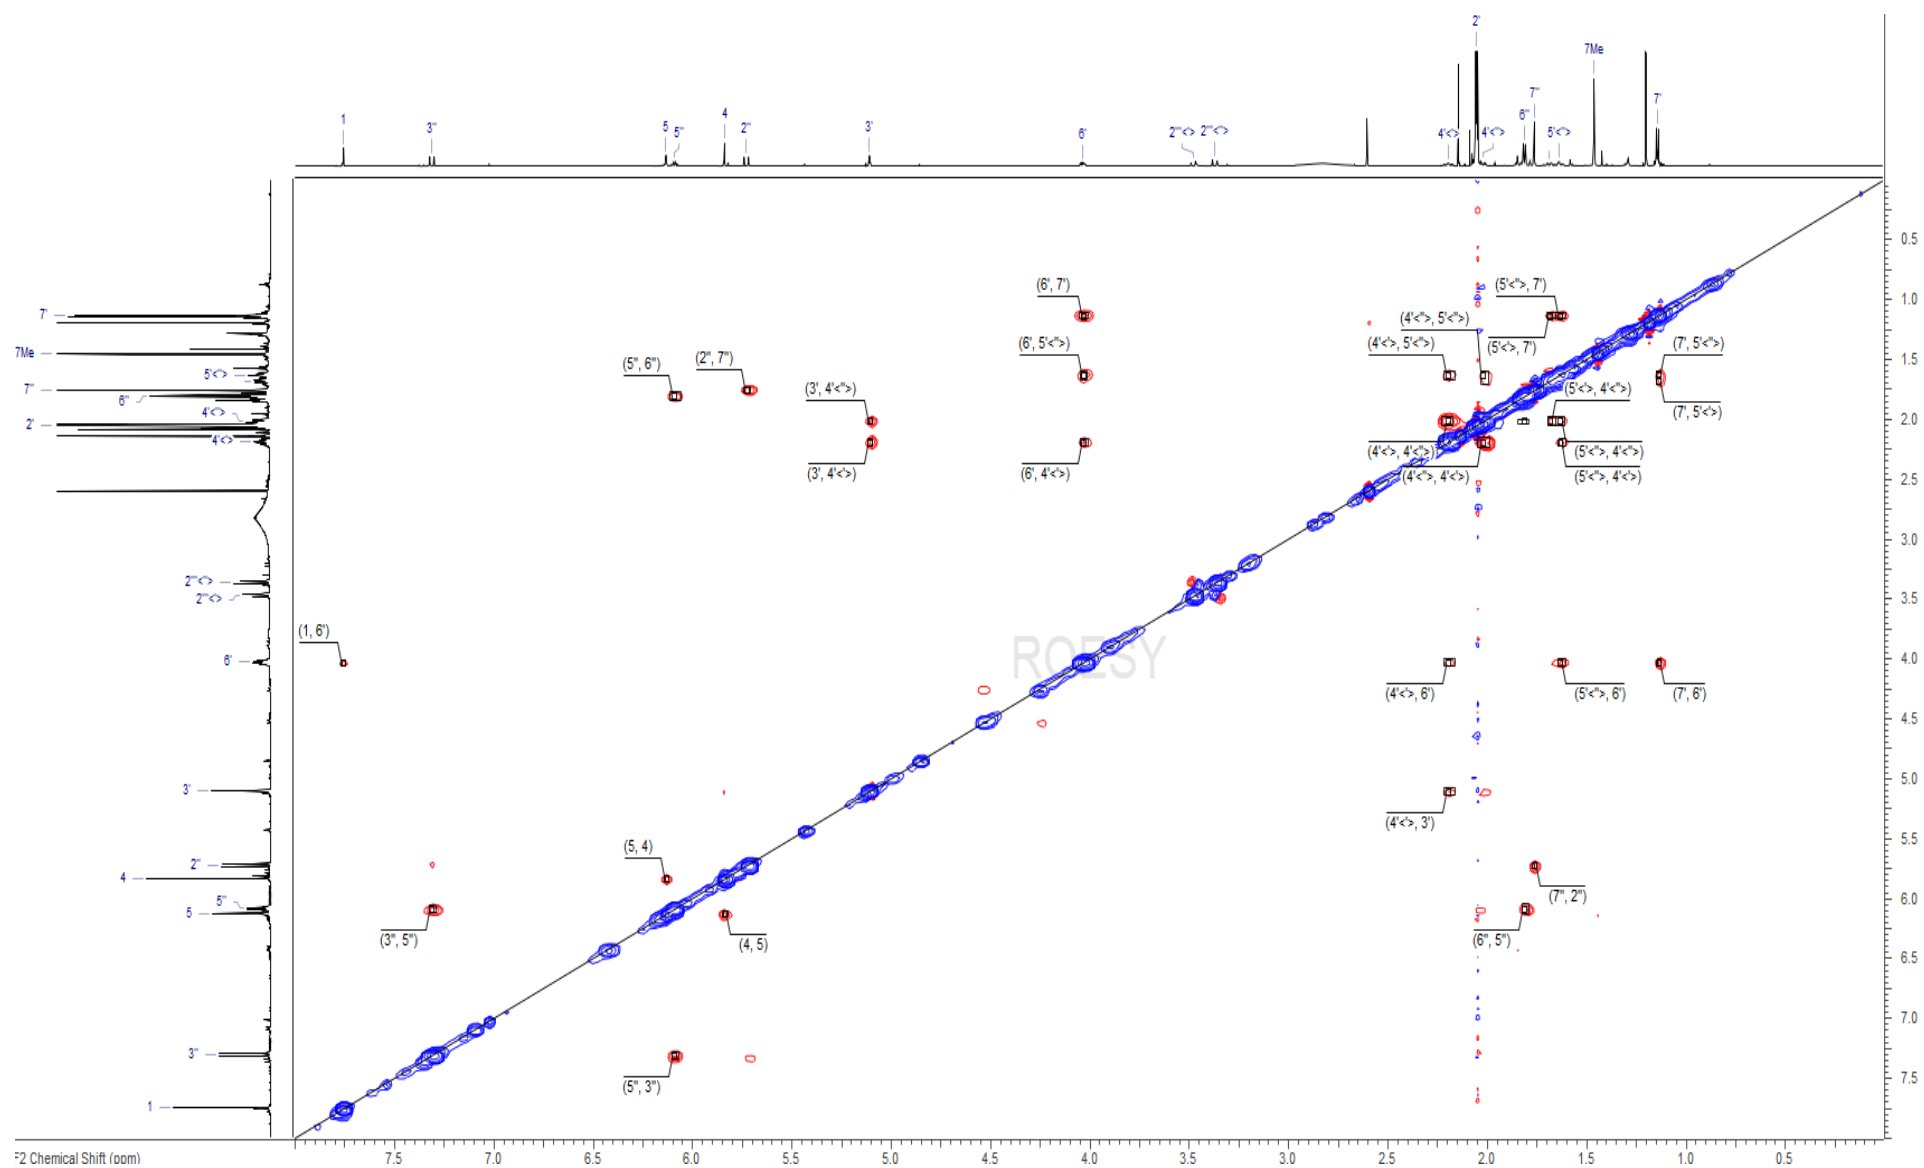

Fig. S15. ROESY NMR spectrum (700 MHz, acetone- $d_6$ ) 3-malonyl daldinin F (**6**).



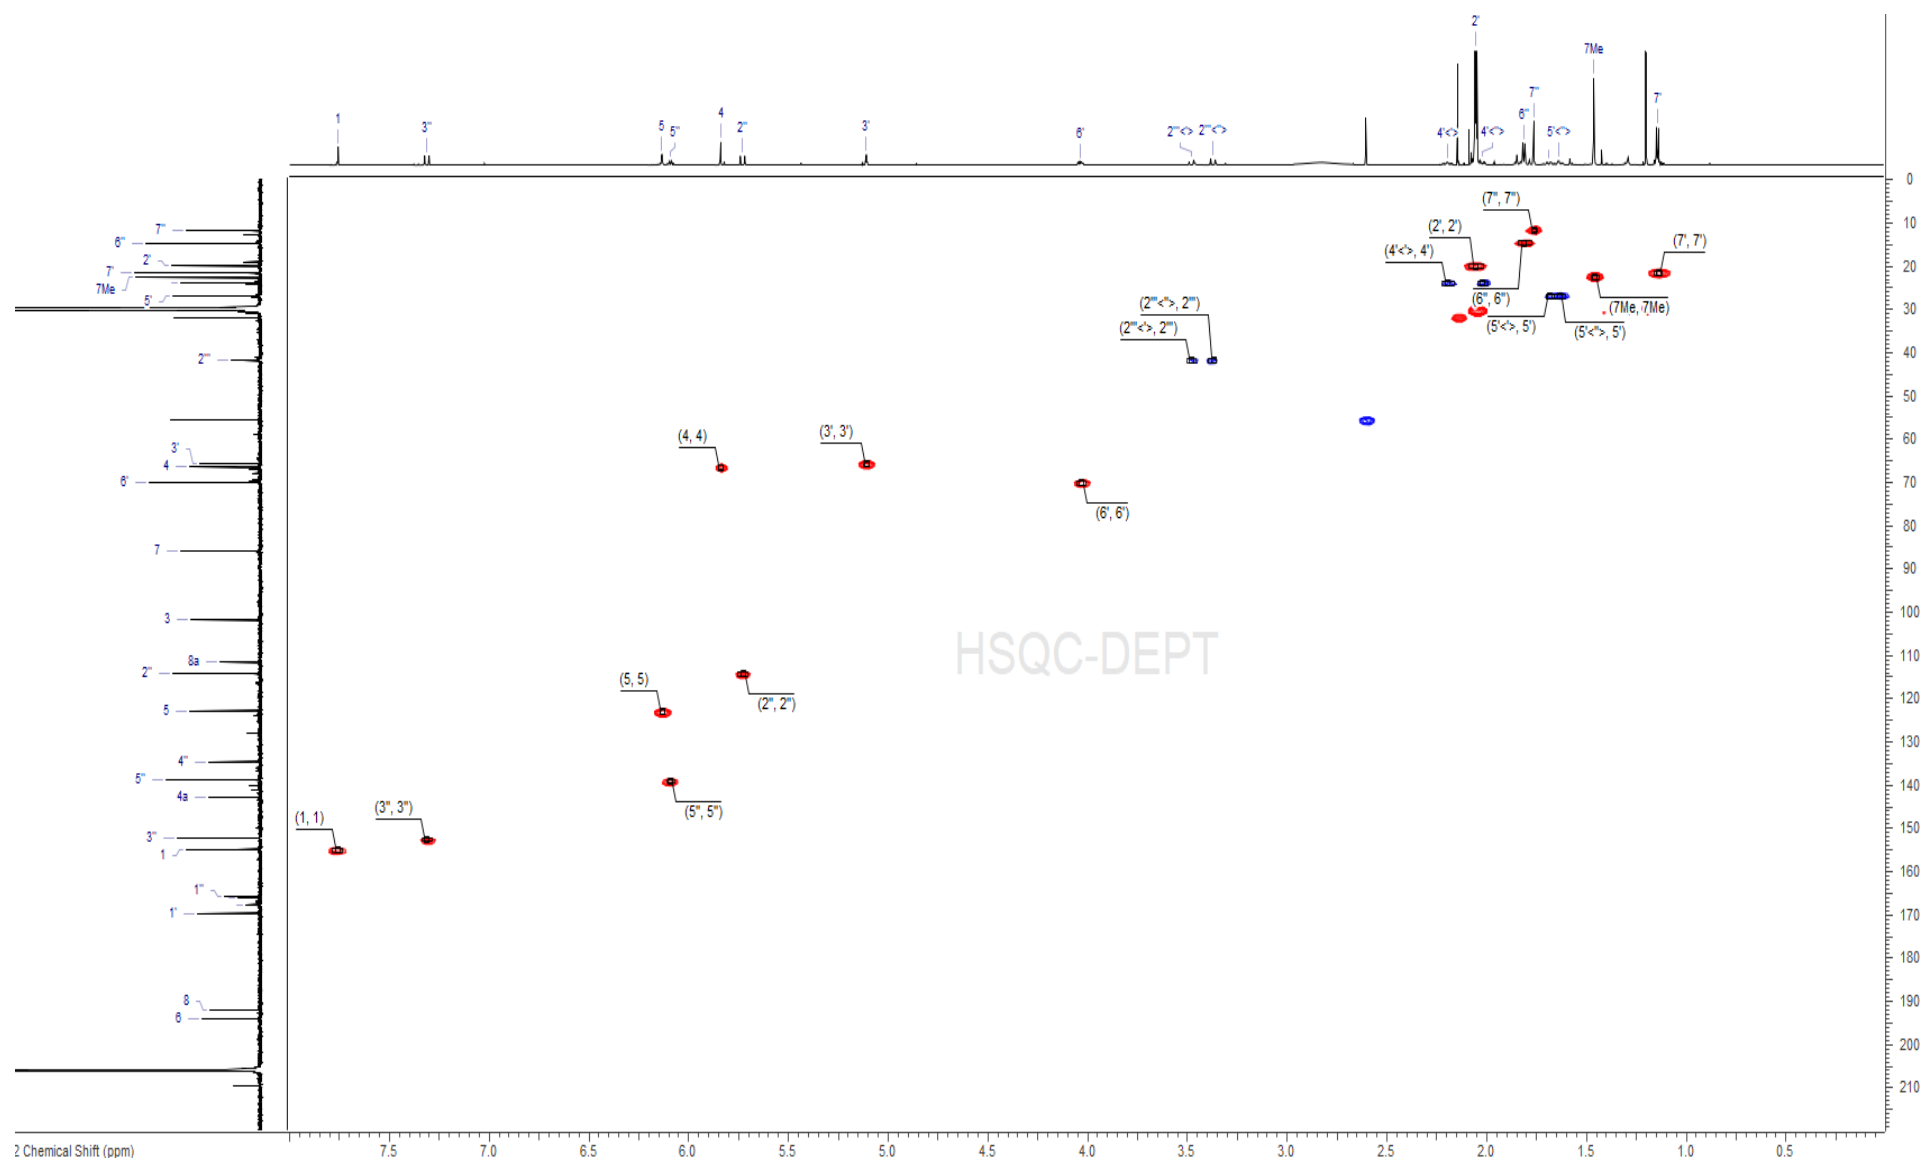

Fig. S16. HSQC NMR spectrum (700 MHz, acetone-*d*<sub>6</sub>) 3-malonyl daldinin F (**6**).
